# Supplementary material for: The impact of nurse-led annual telephone follow-up of patients with inflammatory bowel disease
Source: PubMed Central journal article supplement — BMJ Qual Improv Rep. 2014 Nov 7;3(1):u206365.w2574. doi: 10.1136/bmjquality.u206365.w2574 (PMC4645686; doi:10.1136/bmjquality.u206365.w2574), 2014-11-07
Supplement: bmjqir-3-u206365-w2574-s1.pdf [file bmjqir-3-u206365-w2574-s1.pdf]

**Table 1** Overview of levels of evaluation, questions and data source

| Level of evaluation                                     | Question                                     | Data source                                             |
|---------------------------------------------------------|----------------------------------------------|---------------------------------------------------------|
| <b>Level 1</b>                                          |                                              |                                                         |
| <b>Assessment of need for the program</b>               | Is the program what the patients want?       | Patients asked before the intervention                  |
|                                                         | Is the program what the organisation wants?  | Health professionals asked after implementation         |
| <hr/>                                                   |                                              |                                                         |
| <b>Level 2</b>                                          |                                              |                                                         |
| <b>Assessment of design and theory</b>                  | Does it work in practice?                    | Hospital database                                       |
|                                                         | Can the patients be reached by phone?        | Patients asked after implementation                     |
|                                                         | Do the patients use the acute advice line?   | Health professionals asked after implementation         |
|                                                         |                                              | Longitudinal data sampled every month                   |
| <hr/>                                                   |                                              |                                                         |
| <b>Level 3</b>                                          |                                              |                                                         |
| <b>Assessment of program process and implementation</b> | Are the eligible patients included?          | Longitudinal data sampled every month                   |
|                                                         | Are the nurses competent?                    | Health professionals asked after implementation         |
|                                                         | Are supervision implemented?                 | Audit from an unselected sample of patients             |
|                                                         | Are the aims for implementation reached?     | Patients asked after implementation                     |
|                                                         | Are the patients satisfied?                  |                                                         |
| <hr/>                                                   |                                              |                                                         |
| <b>Level 4</b>                                          |                                              |                                                         |
| <b>Assessment of program outcome</b>                    | Numbers of patients included?                | Longitudinal data sampled every month                   |
|                                                         | Characteristics of included patients?        | Hospital database                                       |
|                                                         | 'Side effects' of the program?               | Health professionals asked after implementation         |
| <hr/>                                                   |                                              |                                                         |
| <b>Level 5</b>                                          |                                              |                                                         |
| <b>Assessment of program cost and efficiency</b>        | Direct cost (budget impact analysis)?        | Estimates of costs                                      |
|                                                         | Indirect cost (cost effectiveness analysis)? | Statistics Denmark                                      |
|                                                         |                                              | The national tariffs for transport reimbursement        |
|                                                         |                                              | Rates for compensation from the National Health Service |
