# Supplementary material for: The impact of nurse-led annual telephone follow-up of patients with inflammatory bowel disease
Source: PubMed Central journal article supplement — BMJ Qual Improv Rep. 2014 Nov 7;3(1):u206365.w2574. doi: 10.1136/bmjquality.u206365.w2574 (PMC4645686; doi:10.1136/bmjquality.u206365.w2574), 2014-11-07
Supplement: bmjqir-3-u206365-w2574-s2.pdf [file bmjqir-3-u206365-w2574-s2.pdf]

**Figure 1** Run charts for data collected monthly in a 3 year period.

**Waiting time for flex-endoscopy and acute appointments**

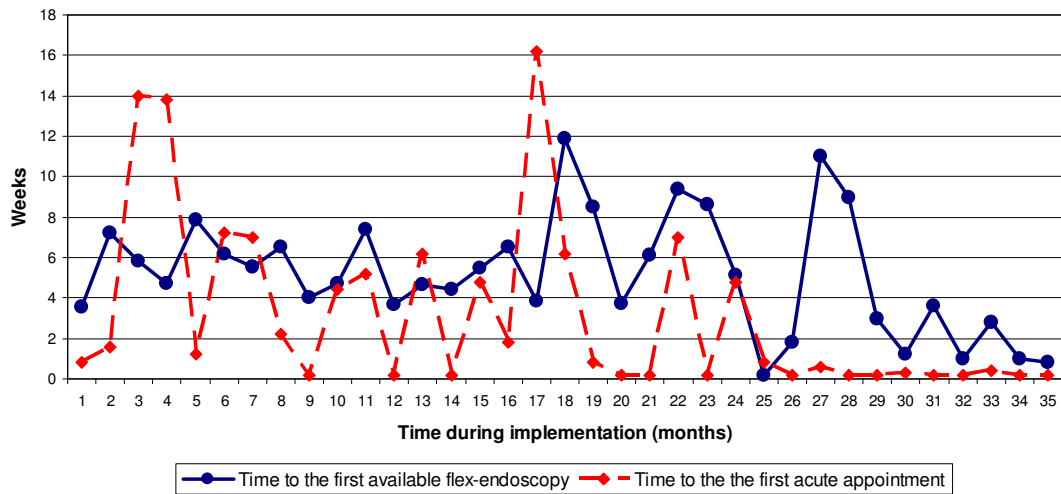

**Waiting time in the waiting room (outpatient clinic)**

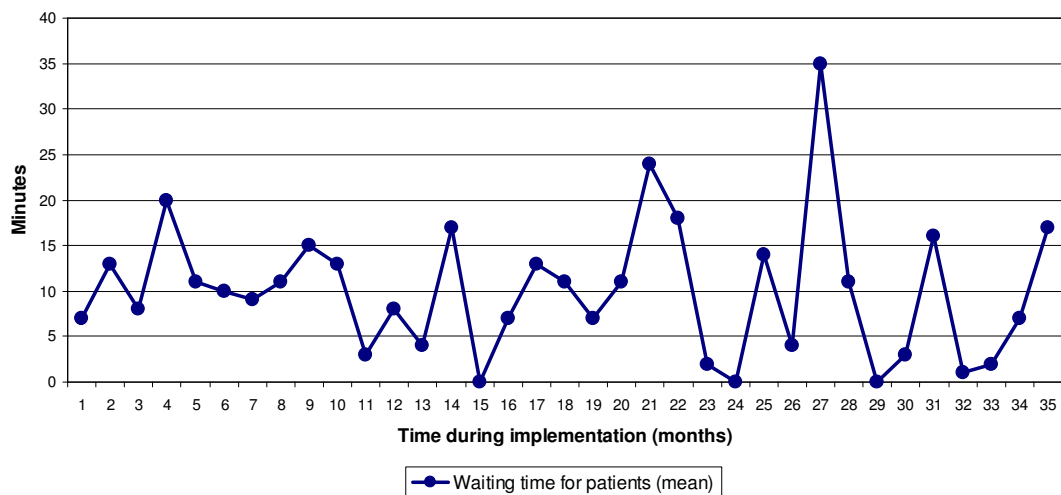

**Proportion of patients who stayed away from their appointment**

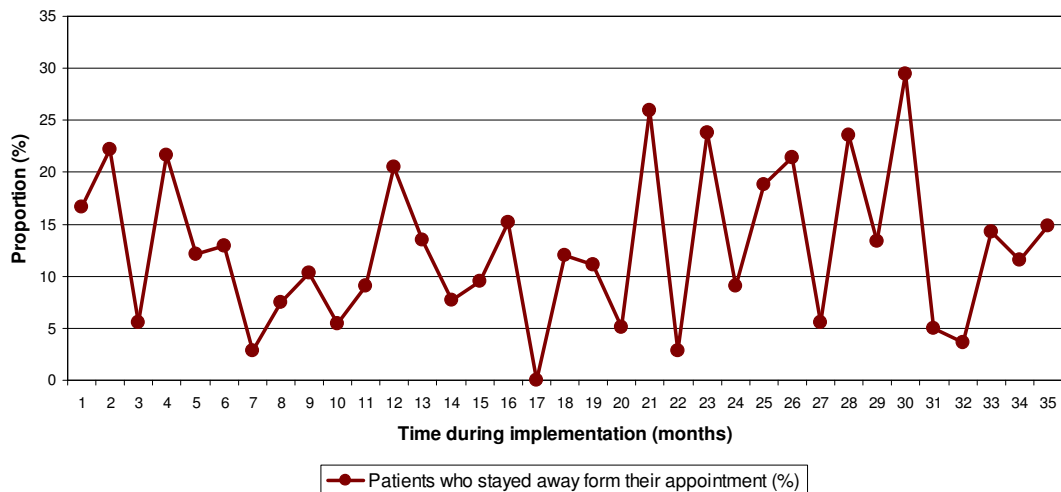

**Table 2** Estimated direct cost when comparing annual phone service by a nurse with routine annual visits in the outpatient clinic.

Time spend for supervision on a daily basis are included in the estimates.

| Patient type                       | Staff type   | Annual phone service             |             | Routine annual visit             |             |
|------------------------------------|--------------|----------------------------------|-------------|----------------------------------|-------------|
|                                    |              | Time spend per patient (minutes) | Cost (€)    | Time spend per patient (minutes) | Cost (€)    |
| <b>Uncomplicated patients</b>      |              |                                  |             |                                  |             |
|                                    | Nurse        | 20                               | 11.0        | 15                               | 8.3         |
|                                    | Secretary    | 10                               | 5.5         | 5                                | 2.8         |
|                                    | Doctor       | 0                                | 0           | 15                               | 16.5        |
|                                    | <b>Total</b> |                                  | <b>16.5</b> |                                  | <b>27.6</b> |
| <b>Patients with some problems</b> |              |                                  |             |                                  |             |
|                                    | Nurse        | 25                               | 13.8        | 20                               | 11.0        |
|                                    | Secretary    | 10                               | 5.5         | 5                                | 2.8         |
|                                    | Doctor       | 10                               | 11.0        | 15                               | 16.5        |
|                                    | <b>Total</b> |                                  | <b>30.3</b> |                                  | <b>30.3</b> |

The staff salary (mean) per hour used in the calculations was: nurses and secretary, 33 €; doctors, 66 €. Patients with disease activity were estimated to have the same cost regardless of the contact form.
